# Supplementary material for: An obesogenic FTO allele causes accelerated development, growth and insulin resistance in human skeletal muscle cells
Source: Springer Nature journal article supplement (doi:10.1038/s41467-024-53820-2), 2025-03-07
Supplement: MOESM10 [file 41467_2024_53820_MOESM10_ESM.pdf]

Reporting Summary

Nature Portfolio wishes to improve the reproducibility of the work that we publish. This form provides structure for consistency and transparency in reporting. For further information on Nature Portfolio policies, see our [Editorial Policies](#) and the [Editorial Policy Checklist](#).

Statistics

For all statistical analyses, confirm that the following items are present in the figure legend, table legend, main text, or Methods section.

| n/a                                 | Confirmed                                                                                                                                                                                                                                                                                      |
|-------------------------------------|------------------------------------------------------------------------------------------------------------------------------------------------------------------------------------------------------------------------------------------------------------------------------------------------|
| <input type="checkbox"/>            | <input checked="" type="checkbox"/> The exact sample size ( <i>n</i> ) for each experimental group/condition, given as a discrete number and unit of measurement                                                                                                                               |
| <input type="checkbox"/>            | <input checked="" type="checkbox"/> A statement on whether measurements were taken from distinct samples or whether the same sample was measured repeatedly                                                                                                                                    |
| <input type="checkbox"/>            | <input checked="" type="checkbox"/> The statistical test(s) used AND whether they are one- or two-sided<br><i>Only common tests should be described solely by name; describe more complex techniques in the Methods section.</i>                                                               |
| <input checked="" type="checkbox"/> | <input type="checkbox"/> A description of all covariates tested                                                                                                                                                                                                                                |
| <input type="checkbox"/>            | <input checked="" type="checkbox"/> A description of any assumptions or corrections, such as tests of normality and adjustment for multiple comparisons                                                                                                                                        |
| <input type="checkbox"/>            | <input checked="" type="checkbox"/> A full description of the statistical parameters including central tendency (e.g. means) or other basic estimates (e.g. regression coefficient) AND variation (e.g. standard deviation) or associated estimates of uncertainty (e.g. confidence intervals) |
| <input type="checkbox"/>            | <input checked="" type="checkbox"/> For null hypothesis testing, the test statistic (e.g. <i>F</i> , <i>t</i> , <i>r</i> ) with confidence intervals, effect sizes, degrees of freedom and <i>P</i> value noted<br><i>Give P values as exact values whenever suitable.</i>                     |
| <input checked="" type="checkbox"/> | <input type="checkbox"/> For Bayesian analysis, information on the choice of priors and Markov chain Monte Carlo settings                                                                                                                                                                      |
| <input checked="" type="checkbox"/> | <input type="checkbox"/> For hierarchical and complex designs, identification of the appropriate level for tests and full reporting of outcomes                                                                                                                                                |
| <input type="checkbox"/>            | <input checked="" type="checkbox"/> Estimates of effect sizes (e.g. Cohen's <i>d</i> , Pearson's <i>r</i> ), indicating how they were calculated                                                                                                                                               |

Our web collection on [statistics for biologists](#) contains articles on many of the points above.

Software and code

Policy information about [availability of computer code](#)

|                 |                                                      |
|-----------------|------------------------------------------------------|
| Data collection | PerkinElmer Operetta CLS.                            |
| Data analysis   | GraphPad Prism version 10.0.2; Image Jversion 1.8.0. |

For manuscripts utilizing custom algorithms or software that are central to the research but not yet described in published literature, software must be made available to editors and reviewers. We strongly encourage code deposition in a community repository (e.g. GitHub). See the Nature Portfolio [guidelines for submitting code & software](#) for further information.

Data

Policy information about [availability of data](#)

All manuscripts must include a [data availability statement](#). This statement should provide the following information, where applicable:

- Accession codes, unique identifiers, or web links for publicly available datasets
- A description of any restrictions on data availability
- For clinical datasets or third party data, please ensure that the statement adheres to our [policy](#)

All data are available in the main text or the supplementary materials. Source data are provided with this paper. All the sequencing data generated in this study have been deposited in the NCBI's Gene Expression Omnibus data bank under accession code GSE262261. Any additional information is available upon request to the corresponding author (Ng Shyh-Chang, huangsq@ioz.ac.cn).

## Research involving human participants, their data, or biological material

Policy information about studies with [human participants or human data](#). See also policy information about [sex, gender \(identity/presentation\), and sexual orientation](#) and [race, ethnicity and racism](#).

Reporting on sex and gender

Reporting on race, ethnicity, or other socially relevant groupings

Population characteristics

Recruitment

Ethics oversight

Note that full information on the approval of the study protocol must also be provided in the manuscript.

## Field-specific reporting

Please select the one below that is the best fit for your research. If you are not sure, read the appropriate sections before making your selection.

☒ Life sciences ☐ Behavioural & social sciences ☐ Ecological, evolutionary & environmental sciences

For a reference copy of the document with all sections, see [nature.com/documents/nr-reporting-summary-flat.pdf](https://www.nature.com/documents/nr-reporting-summary-flat.pdf)

## Life sciences study design

All studies must disclose on these points even when the disclosure is negative.

Sample size

Data exclusions

Replication

Randomization

Blinding

## Reporting for specific materials, systems and methods

We require information from authors about some types of materials, experimental systems and methods used in many studies. Here, indicate whether each material, system or method listed is relevant to your study. If you are not sure if a list item applies to your research, read the appropriate section before selecting a response.

### Materials & experimental systems

### Methods

| n/a                                 | Involved in the study                                           |
|-------------------------------------|-----------------------------------------------------------------|
| <input type="checkbox"/>            | <input checked="" type="checkbox"/> Antibodies                  |
| <input type="checkbox"/>            | <input checked="" type="checkbox"/> Eukaryotic cell lines       |
| <input checked="" type="checkbox"/> | <input type="checkbox"/> Palaeontology and archaeology          |
| <input type="checkbox"/>            | <input checked="" type="checkbox"/> Animals and other organisms |
| <input checked="" type="checkbox"/> | <input type="checkbox"/> Clinical data                          |
| <input checked="" type="checkbox"/> | <input type="checkbox"/> Dual use research of concern           |
| <input checked="" type="checkbox"/> | <input type="checkbox"/> Plants                                 |

| n/a                                 | Involved in the study                           |
|-------------------------------------|-------------------------------------------------|
| <input checked="" type="checkbox"/> | <input type="checkbox"/> ChIP-seq               |
| <input checked="" type="checkbox"/> | <input type="checkbox"/> Flow cytometry         |
| <input checked="" type="checkbox"/> | <input type="checkbox"/> MRI-based neuroimaging |

## Antibodies

Antibodies used

anti-MYOD1 (Santa Cruz, sc-377460, 1:200 for WB);  
 anti-MYOG (Santa Cruz, sc-52903, 1:200 for WB);  
 anti-MF20 (DSHB, AB2147781, 1:600 for WB);  
 anti-pIRS1 (CST, 2385S, 1:1000 for WB);  
 anti-pFOXO1 (CST, 9461S, 1:1000 for WB);  
 anti-pAKT (CST 4060S, 1:1000 for WB);  
 anti-GAPDH (CST, 2118S, 1:1000 for WB);  
 anti-mouse IgG HRP (CST, 7076S, 1:1000 for WB);  
 anti-rabbit IgG HRP (CST, 7074S, 1:1000 for WB);  
 anti-m6A (Abcam, ab151230, 2 µg/ml for MeRIP-RT-qPCR);  
 anti-IGF2 (R&D Systems, AF-292-NA, 0.8 µg/ml for Inhibition of IGF2);  
 anti-Acetyl-Histone H3 (Lys27) (CST, 8173S, 1:100 for ChIP-RT-qPCR).

## Validation

anti-FTO (Abcam, ab94482, <https://www.abcam.cn/products/primary-antibodies/fto-antibody-ab94482.html>);  
 anti-PAX3 (DSHB, AB528426, <https://dshb.biology.uiowa.edu/Pax3>);  
 anti-PAX7 (DSHB, AB528428, <https://dshb.biology.uiowa.edu/PAX7>);  
 anti-MYOD1 (Santa Cruz, sc-377460, <https://www.scbt.com/zh/p/myod-antibody-g-1>);  
 anti-MYOG (Santa Cruz, sc-52903, <https://www.scbt.com/zh/p/myogenin-antibody-5fd>);  
 anti-MF20 (DSHB, AB2147781, <https://dshb.biology.uiowa.edu/MF-20>);  
 anti-pIRS1 (CST, 2385S, <https://www.cellsignal.cn/products/primary-antibodies/phospho-irs-1-ser1101-antibody/2385>);  
 anti-pFOXO1 (CST, 9461S, <https://www.cellsignal.cn/products/primary-antibodies/phospho-foxo1-ser256-antibody/9461>);  
 anti-pAKT (CST 4060S, <https://www.cellsignal.cn/products/primary-antibodies/phospho-akt-ser473-d9e-xp-174-rabbit-mab/4060>);  
 anti-GAPDH (CST, 2118S, <https://www.cellsignal.cn/products/primary-antibodies/gapdh-14c10-rabbit-mab/2118>);  
 anti-mouse IgG HRP (CST, 7076S, <https://www.cellsignal.cn/products/secondary-antibodies/anti-mouse-igg-hrp-linked-antibody/7076>);  
 anti-rabbit IgG HRP (CST, 7074S, <https://www.cellsignal.cn/products/secondary-antibodies/anti-rabbit-igg-hrp-linked-antibody/7074>);  
 anti-m6A (Abcam, ab151230, <https://www.abcam.cn/products/primary-antibodies/n6-methyladenosine-m6a-antibody-ab151230.html>);  
 anti-IGF2 (R&D Systems, AF-292-NA, [https://www.rndsystems.com/cn/products/human-igf-ii-igf2-antibody\\_af-292-na](https://www.rndsystems.com/cn/products/human-igf-ii-igf2-antibody_af-292-na));  
 anti-Acetyl-Histone H3 (Lys27) (CST, 8173S, <https://www.cellsignal.cn/products/primary-antibodies/acetyl-histone-h3-lys27-d5e4-xp-174-rabbit-mab/8173>).

## Eukaryotic cell lines

Policy information about [cell lines and Sex and Gender in Research](#)

## Cell line source(s)

H1, H7, H9 human ESCs were purchased from WiCell in Wisconsin (WA01; WA07; WA09; WiCell, USA).

## Authentication

Fresh or frozen cleavage stage human embryos, produced by in vitro fertilization (IVF) for clinical purposes, were donated by individuals after informed consent and after institutional review board approval. Embryos were cultured to the blastocyst stage, and ES cell lines originating from separate embryos were derived. H1 had a normal XY karyotype, and H7 and H9 had a normal XX karyotype. The cell line was obtained from suppliers. Cell authentication is based on their morphology, growth conditions and specific gene expression.

## Mycoplasma contamination

We routinely check for mycoplasma in the lab and the cells were confirmed mycoplasma free at time of analysis.

Commonly misidentified lines  
(See [ICLAC](#) register)

No commonly misidentified cell lines were used in this study.

## Animals and other research organisms

Policy information about [studies involving animals](#); [ARRIVE guidelines](#) recommended for reporting animal research, and [Sex and Gender in Research](#)

## Laboratory animals

High fat diet (HFD) fed mouse (male, 19-week-old) were purchased from Vital River (Beijing, China). To generate DIO models, HF diet (60% kcal/fat, D12492, Research Diets) were introduced at 6-week-old and fed for 13 consecutive weeks before purchase. All mice were housed in a pathogen-free room conditioned at 20–22 °C with alternating 12 h cycles of light and dark, and with free access to pellet food and water.

## Wild animals

This study did not involve wild animals.

## Reporting on sex

No sex was considered in the study design, because we were just using HFD mouse serum, and it had nothing to do with sex.

## Field-collected samples

This study did not involve samples collected from the field.

## Ethics oversight

All animal experiments and procedures were approved by the Institutional Animal Care and Use Committee (IACUC) of the Institute of Zoology (Chinese Academy of Sciences, IOZ-IACUC-2022-170).

Note that full information on the approval of the study protocol must also be provided in the manuscript.

## Seed stocks

Report on the source of all seed stocks or other plant material used. If applicable, state the seed stock centre and catalogue number. If plant specimens were collected from the field, describe the collection location, date and sampling procedures.

## Novel plant genotypes

Describe the methods by which all novel plant genotypes were produced. This includes those generated by transgenic approaches, gene editing, chemical/radiation-based mutagenesis and hybridization. For transgenic lines, describe the transformation method, the number of independent lines analyzed and the generation upon which experiments were performed. For gene-edited lines, describe the editor used, the endogenous sequence targeted for editing, the targeting guide RNA sequence (if applicable) and how the editor was applied.

## Authentication

Describe any authentication procedures for each seed stock used or novel genotype generated. Describe any experiments used to assess the effect of a mutation and, where applicable, how potential secondary effects (e.g. second site T-DNA insertions, mosaicism, off-target gene editing) were examined.
